# Supplementary material
Source: PubMed Central journal article supplement (PMC3924205)

Figure S1. Specificity of siRNAs used to target Grim-19, MCU, Stat3 and mitoneet.

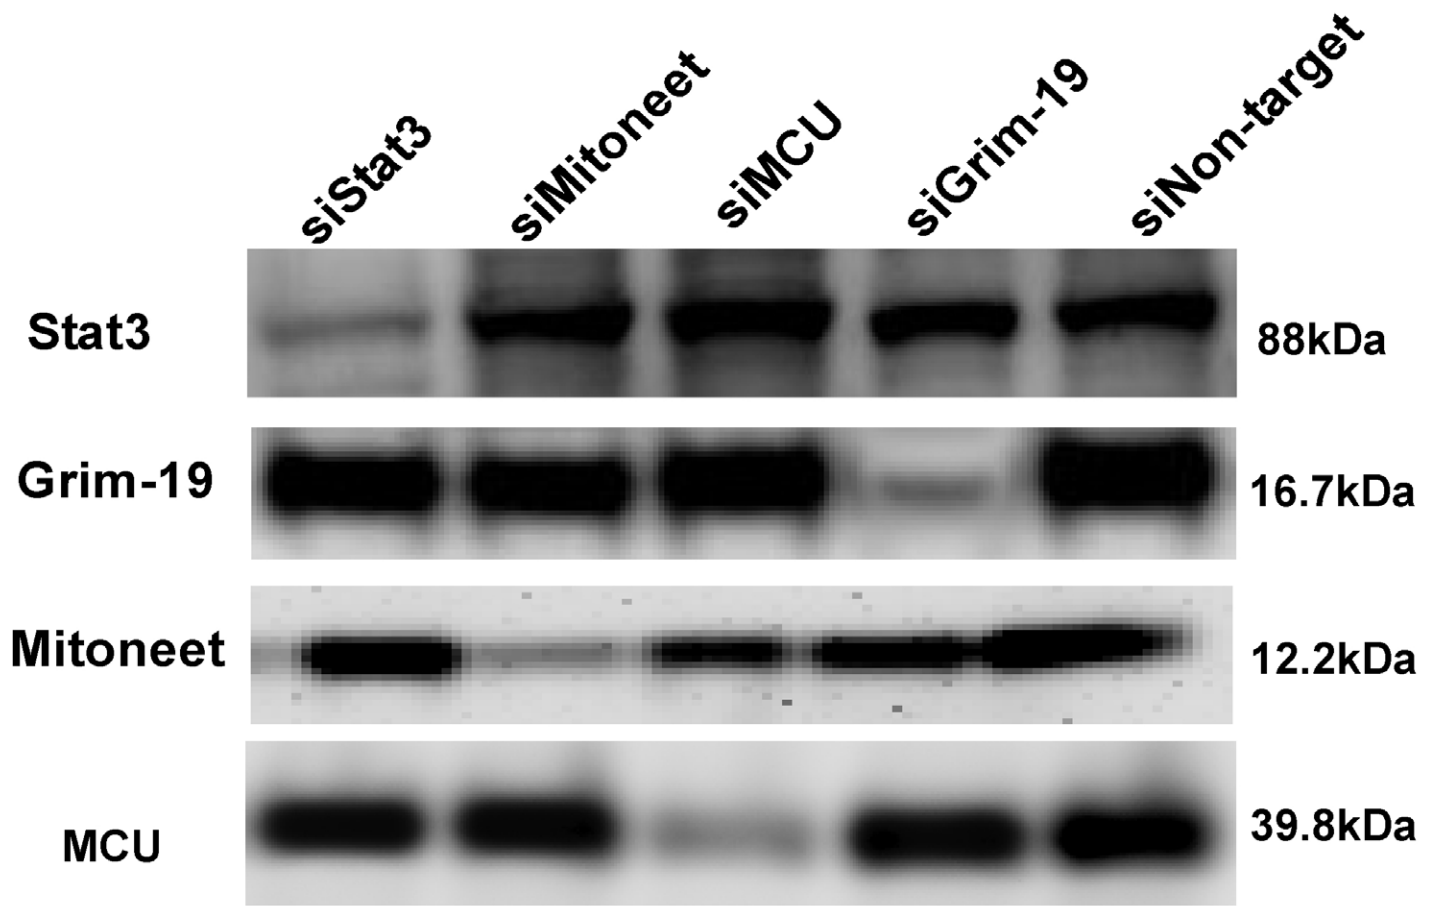

Supplemental  
Figure 1

Supplement: supp_127.4.896_JCS140764.pdf [file supp_127.4.896_JCS140764.pdf]
